# 1 **Genome-wide transcriptional responses of marine nematode *Litoditis*** 2 ***marina* to hyposaline and hypersaline stresses**

3 **Yusu Xie<sup>1,2,3†</sup>, Pengchi Zhang<sup>1,2,3,4†</sup>, Liusuo Zhang<sup>1,2,3\*</sup>**

4 <sup>1</sup>CAS Key Laboratory of Experimental Marine Biology, Institute of Oceanology, Chinese Academy  
5 of Sciences, Qingdao, 266071, China

6 <sup>2</sup>Laboratory of Marine Biology and Biotechnology, Qingdao National Laboratory for Marine Science  
7 and Technology, Qingdao, 266237, China

8 <sup>3</sup>Center for Ocean Mega-Science, Chinese Academy of Sciences, 7 Nanhai Road, Qingdao, 266071,  
9 China

10 <sup>4</sup>University of Chinese Academy of Sciences, Beijing, 100049, China

11 †These authors have contributed equally to this work and share first authorship

12 \* **Correspondence:**

13 Liusuo Zhang

14 lzhang@qdio.ac.cn

15 **Keywords: salinity stress, marine nematode, *Litoditis marina*, hyposaline, hypersaline, gene**  
16 **expression**

## 17 **Abstract**

18 Maintenance of osmotic homeostasis is essential for all organisms, especially for marine animals in the  
19 ocean with 30‰ salinity or higher. However, the underlying molecular mechanisms that how marine  
20 animals adapt to high salinity environment compared to their terrestrial relatives, remain elusive. Here,  
21 we investigated marine animal's genome-wide transcriptional responses to salinity stresses using an  
22 emerging marine nematode model *Litoditis marina*. We found that the transthyretin-like family genes  
23 were significantly increased in both hyposaline and hypersaline conditions, while multiple  
24 neurotransmitter receptor and ion transporter genes were down-regulated in both conditions,  
25 suggesting the existence of conserved strategies for response to stressful salinity environments in *L.*  
26 *marina*. Unsaturated fatty acids biosynthesis related genes, neuronal related tubulins and intraflagellar  
27 transport genes were specifically up-regulated in hyposaline treated worms, while exhibited the  
28 opposite regulation in hypersaline condition. By contrast, cuticle related collagen genes were enriched  
29 and up-regulated for hypersaline response, interestingly, the expression of these collagen genes was  
30 significantly decreased in hyposaline condition. Given a wide range of salinity tolerance of the marine  
31 nematodes, this study and further genetic analysis of key gene(s) of osmoregulation in *L. marina* will  
32 likely provide important insights into biological evolution and environmental adaptation mechanisms  
33 in nematodes and other invertebrate animals in general.

## 34 **1 Introduction**

35 Salinity, as an important ecological factor, affects the physiology and behavior of marine and terrestrial  
36 animals. As a nutrient element in the diet, salt is of vital importance to the health of animal and human.  
37 In human, chronic high dietary salt intake gradually causes an increased risk for cardiovascular disease,  
38 particularly hypertension; as well as other disease such as stroke, gastric cancer, kidney disease and

## *L. marina* response to salinity stresses

39 obesity (Rust and Ekmekcioglu, 2017; He and MacGregor, 2018). Therefore, studies on the underlying  
40 mechanisms of animals' sensation, response, and adaptation to environmental salinity have always  
41 been a hot topic.

42 The multicellular model organism, *Caenorhabditis elegans* senses most of the environmental  
43 disturbance by the terminal cilia of sensory neurons (Bargmann, 2006). It is known that ASH neurons  
44 are required for the perception of high salt, while ASEs are for the low salt. The sensation of salinity  
45 stress can trigger subsequent avoidance behavior to protect worms from harmful salinity conditions  
46 (Hilliard et al., 2005; Kunitomo et al., 2013). Once the stressed salinity environment is unavoidable, *C.*  
47 *elegans* will engage a sleep-like quiescent behavior and cease locomotion and feeding, which is  
48 dependent on ALA neuron (Hill et al., 2014). Due to the imbalance between internal and external  
49 osmotic pressure, the body volume of nematodes undergoes significant changes under salinity stresses,  
50 manifests as shrinkage under hypersaline, and swelling under hyposaline (Lamitina et al., 2004).  
51 Organic osmolytes play an important role in osmotic regulation and salinity stress adaptation for all  
52 organisms. In *C. elegans*, cellular osmotic homeostasis can be maintained by rapid accumulation of  
53 glycerol upon high salinity challenge (Lamitina et al., 2004; Lamitina et al., 2006). It is well accepted  
54 that the *C. elegans*' cuticle might act as a "sensor" in responding to salinity stress damage, which in  
55 turn triggers downstream physiological changes (Choe, 2013; Dodd et al., 2018). On the other hand,  
56 numerous genes involved in osmotic regulation have been identified in *C. elegans*, such as the osmolyte  
57 glycerol synthesis enzyme gene (Lamitina et al., 2004; Lamitina et al., 2006; Choe, 2013), transient  
58 receptor potential cation channel TRP subfamily genes (Choe, 2013), chloride channel genes (Choe,  
59 2013), aquaporin water channel genes (Igual Gil et al., 2017), extracellular matrix component genes  
60 (Lamitina et al., 2006; Choe, 2013), as well as genes related to MAPK, WNK-1/GCK-3, Notch and  
61 insulin-like signaling pathways (Choe, 2013; Dresen et al., 2015; Burton et al., 2017). Many of the above  
62 osmotic regulation genes play evolutionarily conserved roles in systemic osmotic homeostasis in yeast,  
63 flies, plants and mammals (Strange et al., 2006; Burg et al., 2007; Brewster and Gustin, 2014; Pasantés-  
64 Morales, 2016; Zhou et al., 2016; Yang and Guo, 2018), providing clues for treatment of human disease  
65 that accompany osmotic perturbation.

66 *C. elegans* is one of the typical free-living terrestrial nematode species, whereas about 43% of the  
67 known nematode species are distributed in the ocean (Appeltans et al., 2012; Zhang et al., 2015). It is  
68 speculated that nematodes may have emerged from a marine habitat during the Cambrian explosion  
69 (van den Elsen et al., 2009), and colonized land about 442 million years ago (Rota-Stabelli et al., 2013).  
70 Salinity is obviously one of the most significant factors that changed during this successful  
71 terrestrialization. However, the underlying mechanisms are largely unexplored.

72 *Litoditis marina* is a dioecious free-living marine nematode, which is widely distributed in the littoral  
73 zone of coasts and estuaries, and plays an important role in these marine ecosystems (Derycke et al.,  
74 2016; Xie et al., 2020). It possesses some promising characteristics similar as *C. elegans*, such as short  
75 generation time, clear genetic background and a sequenced genome (Xie et al., 2020), which facilitated  
76 its laboratory application for the in-depth study of molecular biology, cell biology, physiology and  
77 behavior regulation in this species. Generally, the habitat salinity for intertidal marine nematodes,  
78 including *L. marina*, is frequently changed due to the influence of many factors such as tides, sun  
79 exposure, rainfall, ocean currents and climate. The effective sensation and response to the dynamic  
80 salinity environments is of great significance for marine nematodes' survival. However, the underlying  
81 molecular mechanism is still unknown.

82 In this study, we challenged *L. marina* L1 larvae with hyposaline and hypersaline stresses respectively,  
83 and further demonstrated their genome-wide transcriptional signatures via RNA sequencing (RNA-seq)

## *L. marina* response to salinity stresses

84 analysis. Both common and specific responding genes were identified in hyposaline and hypersaline  
85 stressed worms. These results not only provide a basis for understanding the salinity response  
86 mechanism for *L. marina*, but also might provide new clues for in-depth exploration of osmoregulation  
87 and environmental adaptation mechanisms for other marine animals.

## 88 **2 Materials and Methods**

### 89 **2.1 Worms**

90 The wild strain of marine nematode *L. marina*, HQ1, was isolated from intertidal sediments (Huiquan  
91 Bay, Qingdao). Healthy worms were cultured on SW-NGM agar plates (prepared with seawater with  
92 a salinity of 30‰) seeded with a lawn of *Escherichia coli* OP50 as a food source, as reported previously  
93 (Xie et al., 2020). Worms were maintained and propagated at 20°C in the laboratory for about 3 years  
94 till this study.

### 95 **2.2 Behavioral and Developmental Analysis under Salinity Stresses**

96 Three sets of salinity conditions were applied for salinity-stress treatment. Artificial seawater-NGM  
97 agar plates were prepared by Sea Salt (Instant Ocean) in 3‰ (hyposaline), 30‰ (control) and 60‰  
98 (hypersaline) salinity, respectively.

99 For behavioral and developmental analysis, 30 newly hatched L1s were transferred onto each indicated  
100 3 cm-diameter agar plates seeded with 15 µl OP50. Worms were scored as active if response was  
101 detected after prodding with a platinum wire 24 h post-treatment. The number of adult worms was  
102 scored 120 h (5 days) post-treatment. Three replicates were performed for each experimental condition.

### 103 **2.3 RNA-seq Analysis**

104 HQ1 strain worms cultured on SW-NGM plates were allowed to lay eggs overnight at 20°C. Eggs were  
105 washed off and collected using filtered sterile seawater, then treated with Worm Bleaching Solution  
106 (Sodium hypochlorite solution : 10 M NaOH : H<sub>2</sub>O = 4 : 1 : 10, prepared in terms of volume ratio) at  
107 room temperature for 1.5 min. Wash eggs twice with sterile seawater. Leave the worms to hatch  
108 overnight and undergo growth arrest in sterile seawater at 20°C. Synchronized L1 worms were  
109 collected by filtration using 500 grid nylon filter of 25 µm mesh size, and then transferred to each 9  
110 cm-diameter agar plates prepared by Sea Salt mentioned above, which were seeded with 100 µl OP50  
111 per plate (covering the entire plate evenly with a coating stick), respectively. Treated L1s were  
112 collected after incubating for 3 h at 20°C under each salinity condition. Worms were washed with M9  
113 for three times to remove the bulk of the residual bacteria. Excess supernatants were removed carefully  
114 via centrifugation. The samples were frozen immediately in liquid nitrogen. Total RNA was then  
115 extracted using Trizol (Invitrogen).

116 With three biological replicates for each treatment, a total of nine RNA libraries were prepared with 3  
117 µg RNA using NEBNext® UltraTM RNA Library Prep Kit for Illumina® (NEB, USA) following  
118 manufacturer's recommendations. Then, RNA libraries were sequenced on an Illumina NovaSeq 6000  
119 platform and 150 bp paired-end reads were generated.

120 Clean data, with Q20 value higher than 97.5 for each sample, were first obtained by removing reads  
121 containing sequencing adaptors, reads having poly-N and low-quality ones from raw data. Then, they  
122 were aligned to the *L. marina* reference genome (Xie et al., 2020) by Hisat2 (v2.0.5) (Kim et al., 2015).  
123 New transcripts for novel genes were predicted and assembled by StringTie (v1.3.3b) (Pertea et al.,

## *L. marina* response to salinity stresses

124 2015), then annotated with Pfam, SUPERFAMILY, GO and KEGG databases (Kanehisa and Goto,  
125 2000;Young et al., 2010). Further, the reads numbers mapped to each gene were analyzed using  
126 featureCounts (v1.5.0-p3, with parameter -Q 10 -B -C) (Liao et al., 2014), and FPKM (expected  
127 number of Fragments Per Kilobase of transcript sequence per Millions base pairs sequenced of each  
128 gene) was calculated based on the length of the gene and reads count mapped to this gene, which was  
129 used for estimating gene expression levels. Differential expression analysis of two conditions was  
130 performed using the DESeq2 R package (v1.16.1) (Love et al., 2014). The resulting *P*-values were  
131 adjusted using the Benjamini and Hochberg's approach for controlling the false discovery rate. Genes  
132 with an adjusted *P*-value < 0.05 found by DESeq2 were assigned as differentially expressed. Moreover,  
133 we used clusterProfiler R package (v3.4.4) to test the statistical enrichment of differential expression  
134 genes in Gene Ontology (GO) terms and KEGG pathways, the corrected *P*-value < 0.05 were  
135 considered significantly enriched by differential expressed genes.

### 136 2.4 Real-Time PCR Analysis

137 Some of the key genes of our interest were selected for qPCR validation: transthyretin-like family gene  
138 EVM0003534, trehalose-6-phosphate synthase gene EVM0007411/*tps-2*, dopamine receptor gene  
139 EVM0000190/*dop-1*, glutamate receptor gene EVM0013383/*glc-4*, acetylcholine receptor gene  
140 EVM0009741/*eat-2*, serotonin receptor gene EVM0012843/*ser-1*, neuropeptide receptor genes  
141 EVM0015448/*npr-6* and EVM0010018/*npr-4*, ion transporter genes EVM0004010/*kcc-2* and  
142 EVM0012374/*twk-24*, fatty acid elongation gene EVM0013022/*elo-2* and fatty acid desaturase gene  
143 EVM0001302/*fat-4*, tubulin gene EVM0007116/*tba-5*, cuticle collagen genes EVM0002243/*col-156*  
144 and EVM0005554/*col-107*.

145 Synchronized L1 worms were separately treated under each salinity condition (3‰, 30‰ and 60‰)  
146 using artificial seawater-NGM plates (prepared by Sea Salt, Instant Ocean) at 20°C for 3 h. Each  
147 treatment was performed for three biological repeats. Total RNA was extracted using Trizol  
148 (Invitrogen), reverse transcribed to cDNA using the ReverTra Ace® qPCR RT Master Mix with gDNA  
149 Remover kit (TOYOBO, Code No. FSQ-301), and the cDNA was used for qPCR analysis using the  
150 QuantStudio™ 6 Flex Real-Time PCR System (Applied Biosystems) and SYBR Green detection  
151 system (TOYOBO, Code No. QPK-201). The primers information of totally 15 salinity related genes,  
152 listed above, was shown in Supplementary file 1. Each experiment was performed in triplicates for  
153 each biological replica. Values were normalized against the reference gene EVM0013809, which is  
154 orthologue of *C. elegans* gene *cdc-42* (Hoogewijs et al., 2008). Gene expression was presented as a  
155 fold change using the delta Ct method (Livak and Schmittgen, 2001). Data were statistically analyzed  
156 by one-way analysis of variance (one-way ANOVA) using SPSS software 11.0; values were considered  
157 to be significant at *P* < 0.05.

## 158 3 Results

### 159 3.1 *L. marina* behavioral and Developmental Defects under Salinity Stresses

160 *L. marina* is maintained under 30‰ salinity condition in the laboratory, around 91% newly hatched L1  
161 larvae developed into adulthood after 5 days at 20°C (**Figure 1B**). To test its salinity tolerance, we first  
162 treated L1 worms under two conditions: hyposaline with a 3‰ salinity and hypersaline with a 60‰  
163 salinity. We observed that L1 worms were paralyzed immediately on both salinity plates, with obvious  
164 body volume change in a manner similar to that reported in *C. elegans* (Lamitina et al., 2004). Worms  
165 can recover their motility afterwards. Compared to the control group (30‰ salinity), approximately  
166 88% worms under hyposaline could move normally after 24 h, whereas only 29.4% L1s could recover  
167 motility under hypersaline (**Figure 1A**). Next, we did the same test applied to even higher salinity

## *L. marina* response to salinity stresses

168 conditions such as 70‰ and 80‰, and observed that worms cannot survive under those conditions,  
169 indicating 60‰ is the extreme high salinity for *L. marina* to tolerate.

170 We further found that, upon the 5th day of treatment, 57.5% worms reached adulthood under  
171 hyposaline (3‰), while no adults was observed under hypersaline (60‰) condition. Thus, both  
172 hyposaline and hypersaline attenuated worms' development (**Figure 1B**).

173 Taken together, worms exhibited both significantly behavioral and developmental defects when  
174 stressed with either low salinity or high salinity.

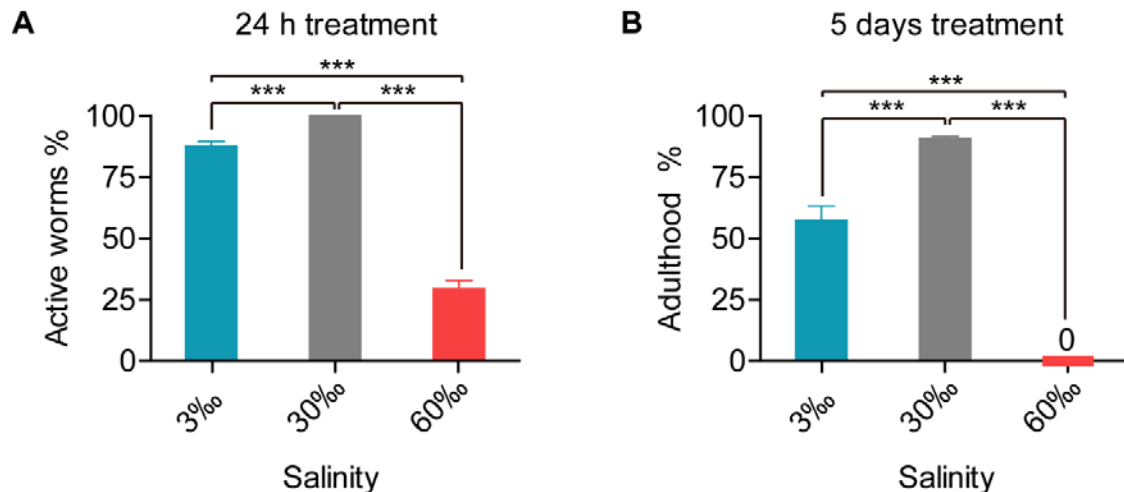

175

176 • **FIGURE 1. Behavioral and developmental defects in *L. marina* responding to salinity stresses.** Marine  
177 nematode *L. marina* which is normally maintained under 30‰ salinity condition, showed both behavioral (**A**) and  
178 developmental (**B**) defects when stressed with either low salinity (3‰) or high salinity (60‰). Notably, worms showed  
179 enhanced defects under 60‰ salinity.

### 180 3.2 RNA-seq Analysis in *L. marina* under Hyposaline and Hypersaline Environments

181 To investigate genome-wide responses in *L. marina* to salinity stress, we used RNA-seq analysis.  
182 Newly hatched L1s were treated for 3 h on low salinity (3‰), normal salinity (30‰, control) and high  
183 salinity (60‰) plates, respectively (**Figure 2A**). A total of 1209 differentially expressed genes (DEGs)  
184 were identified under low salinity, and 1330 DEGs under high salinity. Interestingly, there were 108  
185 up-regulated DEGs and 93 down-regulated DEGs shared in both conditions (**Figure 2A**), indicating  
186 common response patterns under hyposaline and hypersaline stresses. On the other hand, condition-  
187 specific DEGs exhibited salinity-dependent responsive and regulatory mechanisms in *L. marina*.  
188 Details of significantly up-regulated and down-regulated DEGs were listed in Supplementary file 2.

189 Based on GO enrichment analysis for DEGs, we observed that there were more up-regulated GO terms  
190 significantly enriched under low salinity, whereas more down-regulated GO terms were significantly  
191 enriched under high salinity (**Figure 2B**). Specifically, extracellular region genes were up-regulated  
192 while receptor and transporter genes were down-regulated under both conditions (**Figure 2B**).

## *L. marina* response to salinity stresses

### A. Experimental design and transcriptomic signature

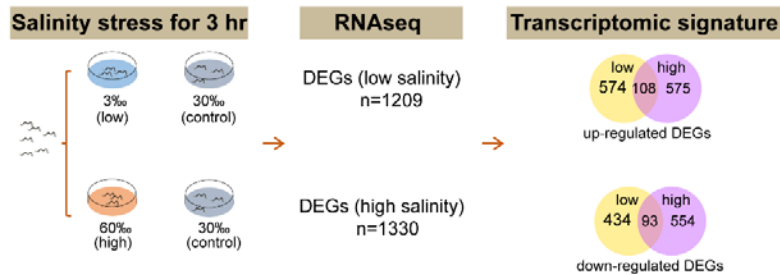

### B. GO enrichment analysis for DEGs

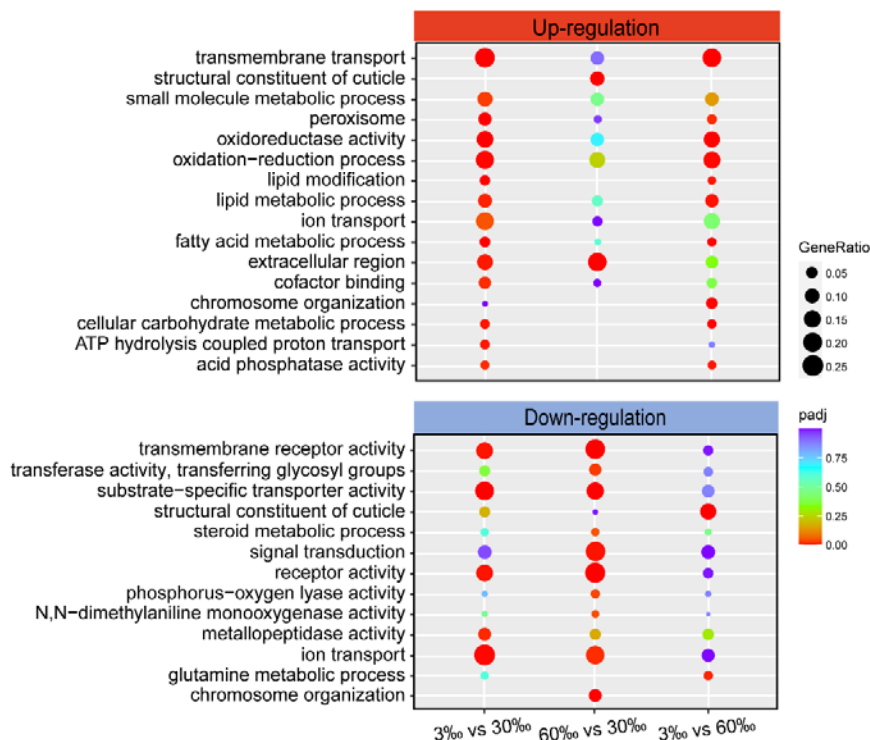

193

194

195

196

197

198

• **FIGURE 2. RNA-seq identifies the transcriptomic signature of short-time salinity stressed marine nematodes.** (A) Experimental design of this study and the resulting transcriptomic signature of salinity stressed worms. Differentially expressed genes (DEGs,  $|\log_2\text{foldchange}| > 1$ ; DESeq2  $\text{padj} < 0.05$ ) were determined for each condition. (B) GO enrichment analysis for DEGs.  $|\log_2\text{foldchange}| > 1$ ; DESeq2  $\text{padj} < 0.05$  was set as the differential gene screening threshold.

199

200

### 3.3 Shared Transcriptomic Signature of *L. marina* under both Low and High Salinity Stress Conditions

201

202

203

As both hyposaline and hypersaline stresses lead to behavioral and developmental defects in *L. marina*, common transcriptomic signature was found between these two conditions based on GO enrichment analysis.

204

205

206

207

As shown in Figure 2B, extracellular region related genes were significantly enriched in DEGs in both examined salinity conditions. We found that a series of transthyretin-like family genes, such as EVM0004638/*ttr-30* and EVM0003584/*ttr-48*, were up-regulated under both conditions (**Figure 3A**), indicating that extracellular region related genes can be induced by either low or high salinity stress.

## *L. marina* response to salinity stresses

208 In addition, the trehalose-6-phosphate synthase gene (EVM0007411/*tps-2*, **Figure 3B**), which is  
209 crucial for trehalose biosynthesis, was significantly induced upon both salinity stresses.

210 Moreover, we found that multiple neurotransmitter receptor genes were down-regulated in both  
211 conditions (**Figure 3C-F**). The expression levels of seven nicotinic acetylcholine receptor genes  
212 (EVM0016127/*eat-2*, EVM0009741/*eat-2*, EVM0006289/*acr-3*, EVM0007902/*acr-5*,  
213 EVM0000893/*acr-11*, EVM0017511/*acr-12* and EVM0000581), as well as two muscarinic  
214 acetylcholine receptor genes (EVM0002137/*gar-2* and EVM0004071), were significantly down-  
215 regulated in both hyposaline and hypersaline conditions (**Figure 3C**). Similarly, eight serotonin  
216 receptor genes (such as EVM0012843/*ser-1*, EVM0010676/*ser-2* and EVM0015579/*ser-7*, **Figure**  
217 **3D**), two dopamine receptor genes (EVM0000190/*dop-1* and EVM0017335, **Figure 3E**), seven  
218 glutamate receptor genes (EVM0013383/*glc-4*, EVM0014318/*glc-2*, EVM0009860/*mgl-1*,  
219 EVM0004669/*avr-15*, EVM0006506/*ggr-2*, EVM0006298/*avr-14* and EVM0007820/*glr-1*, **Figure**  
220 **3E**), and eleven neuropeptide receptor genes (such as EVM0010018/*npr-4*, EVM0015448/*npr-6*,  
221 EVM0005173/*npr-15*, EVM0001642/*ckr-1*, EVM0017131/*ckr-2*, EVM0007447/*frpr-9*,  
222 EVM0001412/*lat-2* and EVM0010714/*lat-2*, **Figure 3F**) were all significantly down-regulated. These  
223 results implied that certain neuronal related signaling transduction processes were severely impaired  
224 by short-time stresses caused by both low and high salinity.

225 Additionally, based on studies on fishes and marine invertebrates, ion transporters and channels are  
226 key components of osmoregulation (Niu et al., 2020; Vij et al., 2020; Zhang et al., 2020a). In the present  
227 study, a dozen of V-type H<sup>+</sup>-transporting ATPase genes (EVM0006836/*vha-1*, EVM0002567/*vha-3*,  
228 EVM0005735/*vha-4*, EVM0007934/*vha-5*, EVM0008894/*vha-5*, EVM0000966/*vha-7*,  
229 EVM0001861/*vha-8*, EVM0014072/*vha-12*, EVM0014618/*vha-13*, EVM0014647/*vha-15*,  
230 EVM0015095/*vha-16* and EVM0006795/*vha-19*) were enriched and showed elevated expression  
231 under hyposaline condition (**Supplementary Figure 1**). The upregulation of these genes was also  
232 reported in other marine invertebrates, including the mud crab *Scylla paramamosain* (Niu et al., 2020)  
233 and the shrimp *Litopenaeus vannamei* (Wang et al., 2012), indicating their conserved function in  
234 response to low salinity stress among marine invertebrates. However, most of those V-type H<sup>+</sup>-  
235 transporting ATPase genes were also upregulated under hypersaline condition in *L. marina*  
236 (**Supplementary Figure 1**), suggesting a specific role in marine nematodes. On the other hand, a  
237 battery of ion channel and transporter genes such as potassium channel genes (EVM0012374/*twk-24*,  
238 EVM0015790/*shw-3*, EVM0004766/*kcnl-3* and EVM0004207/*kcnl-2*), sodium channel genes  
239 (EVM0009270/*egas-2* and EVM0008949/*nhx-8*), cyclic nucleotide gated channel gene  
240 (EVM0006320/*tax-4*), potassium/chloride transporter gene (EVM0004010/*kcc-2*), transient receptor  
241 potential cation channel genes (EVM0012432/*trp-1*, EVM0001337/*trp-2* and EVM0005441/*osm-9*)  
242 were identified, demonstrating down-regulation in both stress environments (**Figure 3G**), reflecting  
243 their association with the ionic homeostasis under salinity stresses.

244 Overall, these shared features indicate the existence of conserved strategies for response to stressful  
245 salinity environments in *L. marina*.

## *L. marina* response to salinity stresses

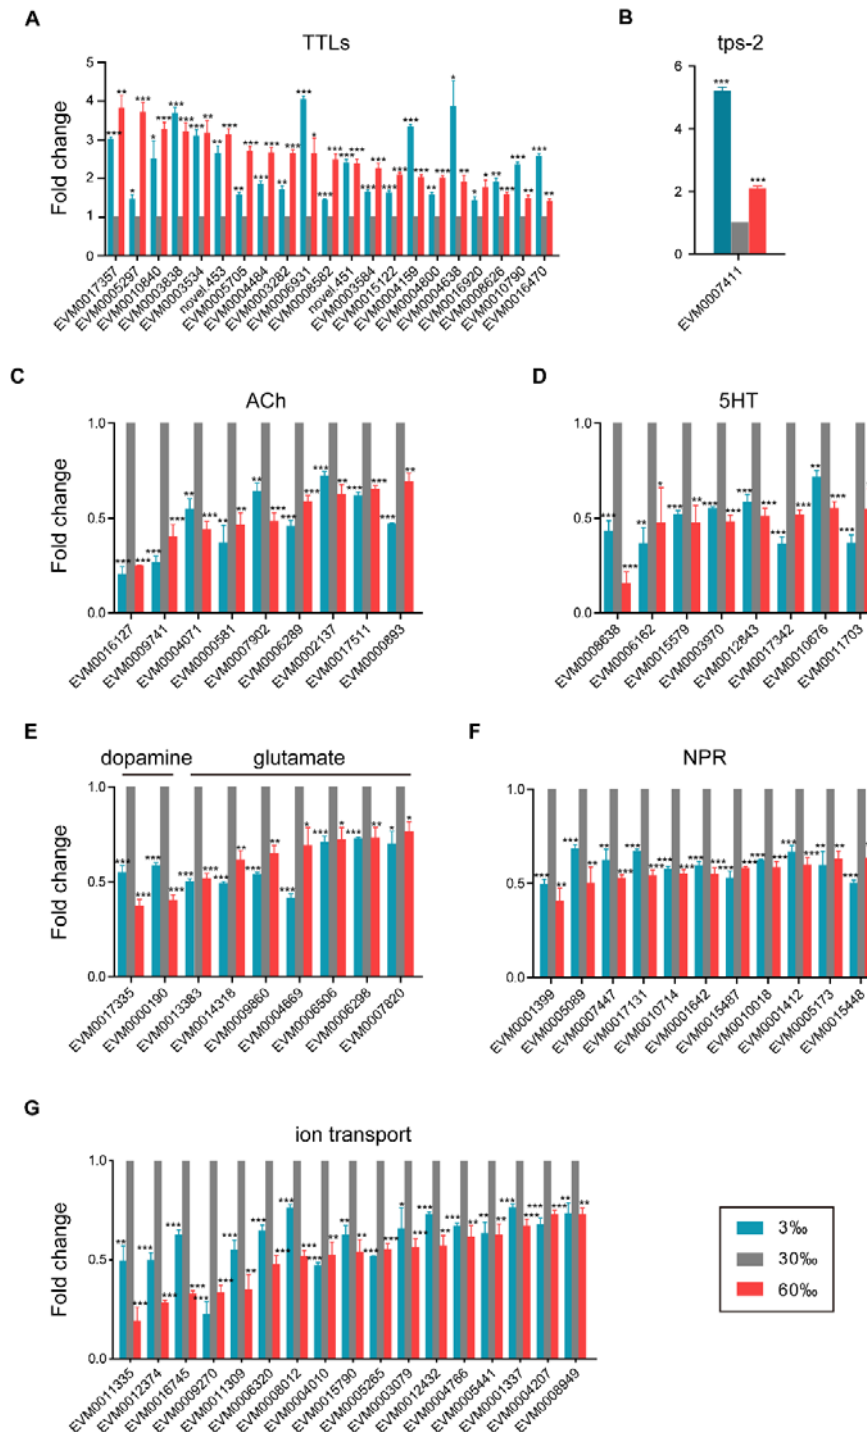

246

247

248

249

250

251

252

253

• **FIGURE 3. Shared transcriptomic signature under both hyposaline and hypersaline environments.** (A) Expression level of transthyretin-like family genes (TTLs). (B) Expression level of trehalose-6-phosphate synthase gene (*tps-2*). (C) Expression level of acetylcholine receptor genes (ACh). (D) Expression level of serotonin receptor genes (5HT). (E) Expression level of dopamine and glutamate receptor genes. (F) Expression level of neuropeptide receptor genes (NPR). (G) Expression level of ion transporter genes. Fold change indicates the ratio of the treatment group (3‰, 60‰, as indicated) to the control group (30‰). The error bars represent standard error of the mean of three biological replicates per condition. \*P < 0.05, \*\*P < 0.01, \*\*\*P < 0.001.

### 254 3.4 Up-regulated Genes under Low Salinity Condition



## *L. marina* response to salinity stresses

255 Hyposaline (3‰) impacted *L. marina* development, we thus further analyzed genes that were induced  
 256 specifically under this low salinity condition, and detected 144 DEGs (**Figure 4A**). For instance, fatty  
 257 acid desaturase genes (EVM0008235/*fat-2*, EVM0001302/*fat-4* and EVM0011847/*fat-3*), very long  
 258 chain fatty acid elongase genes (EVM0013022/*elo-2*, EVM0000114/*elo-6* and EVM0000630/*elo-5*),  
 259 very-long-chain enoyl-CoA reductase gene (EVM0000944/*art-1*), and long-chain-fatty-acyl-CoA  
 260 reductase gene (EVM0015936/*let-767*), involved in biosynthesis of unsaturated fatty acids (UFAs),  
 261 were significantly accelerated (**Figure 4B**). These results suggested that UFAs might play important  
 262 roles in *L. marina*'s responding to low salinity stress.

263 In addition, we observed specifically up-regulation in four tubulin genes (EVM0017317/*tba-4*,  
 264 EVM0007116/*tba-5*, EVM0015250 and EVM0004244/*ben-1*, **Figure 4C**) and two intraflagellar  
 265 transport (IFT) genes (EVM0001368/*osm-3* and EVM0002085/*daf-10*, **Figure 4C**) under low salinity  
 266 condition.

267 However, the above UFAs, tubulin and IFT genes showed significantly opposing changes between low  
 268 and high salinity stresses (**Figure 4B-C**), indicating their critical roles in salinity stress response.

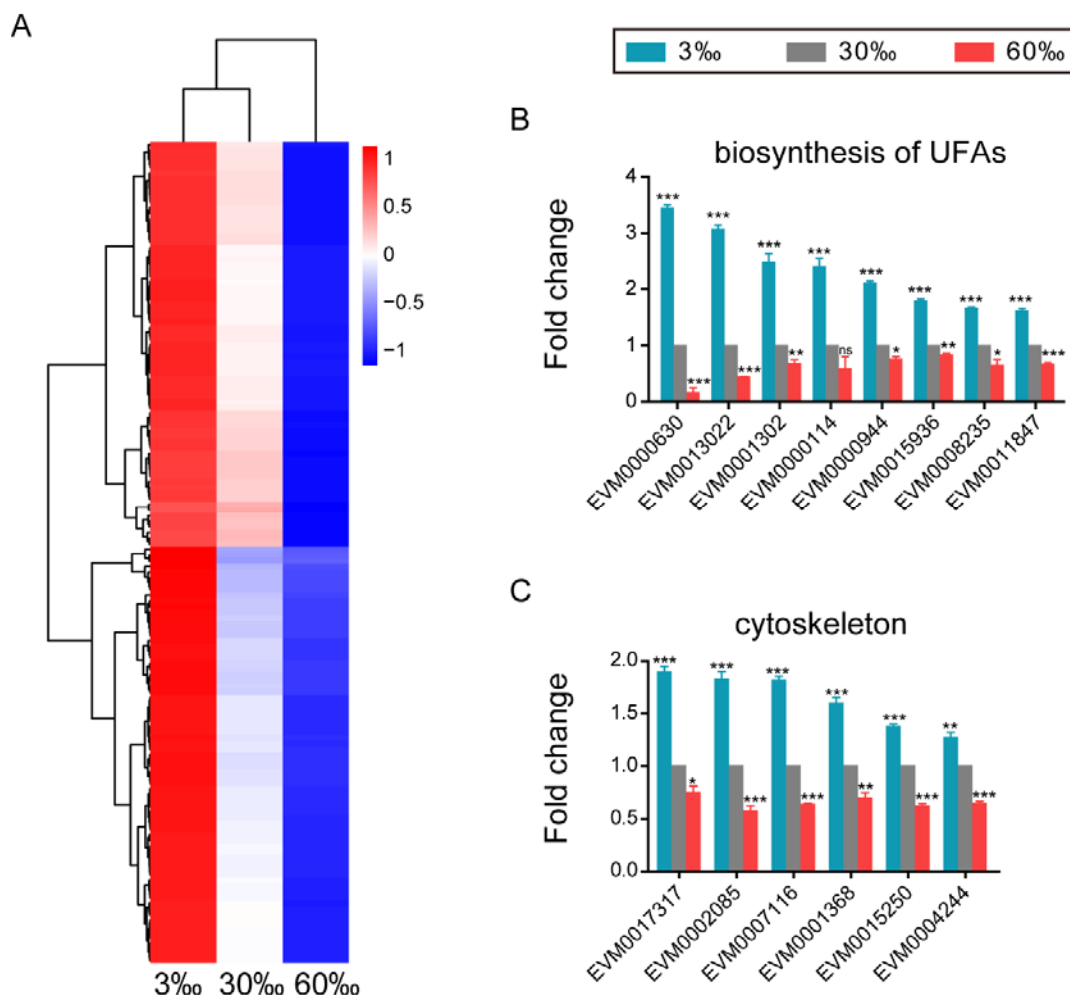

269 •  
 270 • **FIGURE 4. Genes that up-regulated in expression with decreasing salinity.** (A) Heatmap of DEGs that up-  
 271 regulated in expression with decreasing salinity. The scale bar shows the z-score for a differentially expressed gene.  
 272 Red indicates upregulation; blue indicates downregulation. (B) Expression level of genes involved in biosynthesis of  
 273 unsaturated fatty acids (UFAs). (C) Expression level of cytoskeleton tubulin and related intraflagellar transport (IFT)  
 274 genes. Fold change indicates the ratio of the treatment group (3‰, 60‰, as indicated) to the control group (30‰). The

## *L. marina* response to salinity stresses

275 error bars represent standard error of the mean of three biological replicates per condition. \* $P < 0.05$ , \*\* $P < 0.01$ , \*\*\* $P$   
 276  $< 0.001$ .

### 277 3.5 Up-regulated Genes under High Salinity Condition

278 Although worms hardly survived under high salinity stress, 192 DEGs were found having the highest  
 279 expression levels under this extreme condition (**Figure 5A**). Dozens of cuticle related collagen genes  
 280 were up-regulated under 60‰ salinity, including EVM0002243/*col-156*, EVM0010502/*dpy-5*,  
 281 EVM0000427/*col-77*, EVM0006032/*col-86*, EVM0016231/*col-166*, EVM0005554/*col-107*,  
 282 EVM0001263/*col-104*, EVM0001382/*lon-3*, EVM0003934/*col-149*, EVM0008240/*dpy-17*,  
 283 EVM0011594/*sqt-3*, and EVM0000108/*col-93* (**Figure 5B**). It is likely reflecting essential roles of  
 284 these collagen genes in response to high salinity. Of note, most of the above collagen genes showed  
 285 significantly opposing changes under low and high salinity stresses (**Figure 5B**).

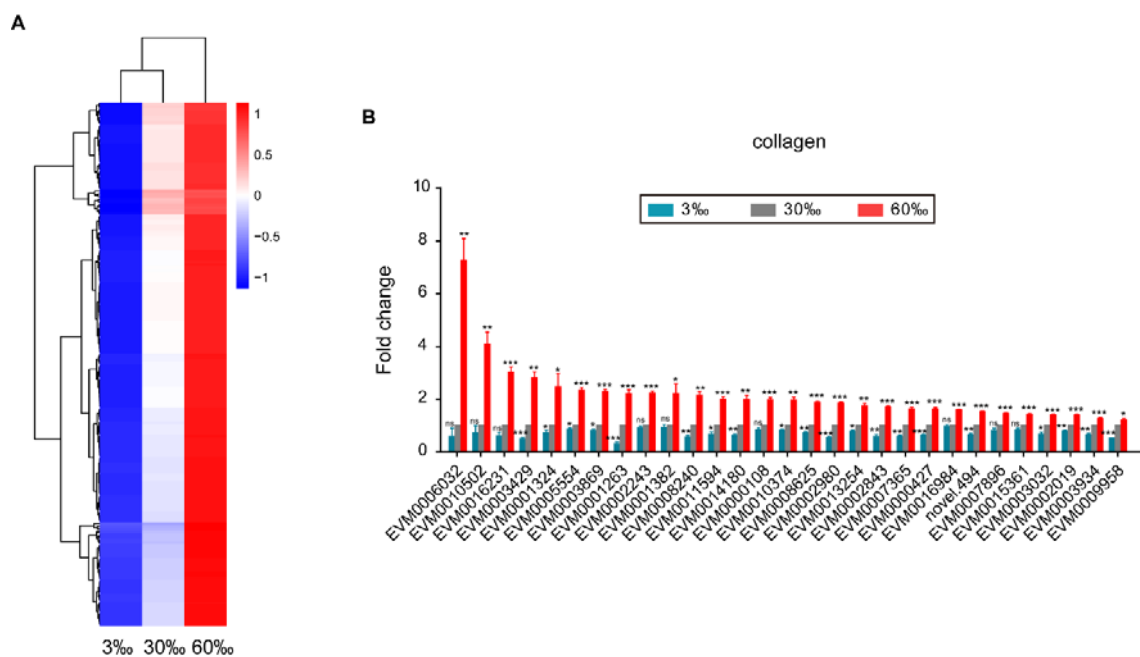

286 ●  
 287 ● **FIGURE 5. Genes that up-regulated in expression with increasing salinity.** (A) Heatmap of DEGs that up-  
 288 regulated in expression with increasing salinity. The scale bar shows the z-score for a differentially expressed gene.  
 289 Red indicates upregulation; blue indicates downregulation. (B) Expression level of cuticle collagen genes. Fold change  
 290 indicates the ratio of the treatment group (3‰, 60‰, as indicated) to the control group (30‰). The error bars represent  
 291 standard error of the mean of three biological replicates per condition. \* $P < 0.05$ , \*\* $P < 0.01$ , \*\*\* $P < 0.001$ .

### 292 3.6 Quantitative Real-time PCR Validation

293 We applied qPCR to validate the expression patterns of interest genes identified from our RNA-seq  
 294 results. Consistent trends were detected and shown as in Figure 6. The expression levels of  
 295 transthyretin-like family gene EVM0003534, trehalose-6-phosphate synthase gene EVM0007411/*tps-*  
 296 *2*, were significantly increased under both 3‰ and 60‰ salinity conditions (**Figure 6**). While, the  
 297 expression levels of dopamine receptor gene EVM0000190/*dop-1*, glutamate receptor gene  
 298 EVM0013383/*glc-4*, acetylcholine receptor gene EVM0009741/*eat-2*, serotonin receptor gene  
 299 EVM0012843/*ser-1*, neuropeptide Y receptor genes EVM0015448/*npr-6* and EVM0010018/*npr-4*, ion  
 300 transporter genes EVM0004010/*kcc-2* and EVM0012374/*twk-24*, were significantly decreased under  
 301 both conditions (**Figure 6**). In addition, we confirmed that fatty acid elongase gene EVM0013022/*elo-*  
 302 *2*, fatty acid desaturase gene EVM0001302/*fat-4*, tubulin gene EVM0007116/*tba-5*, were up-regulated  
 303 under hyposaline whereas down-regulated under hypersaline environment (**Figure 6**). By contrast, the

## *L. marina* response to salinity stresses

304 expression of cuticle collagen genes EVM0002243/*col-156* and EVM0005554/*col-107* were validated  
 305 showing specific upregulation under high salinity stress (**Figure 6**).

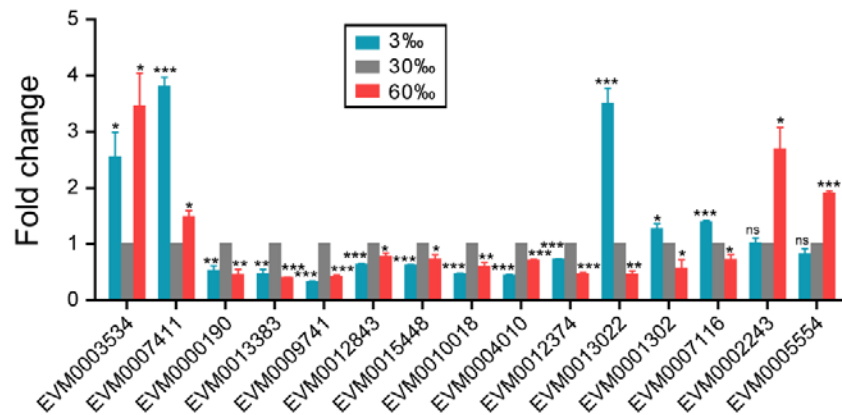

306

307 • **FIGURE 6. Validation of the RNA-seq results using qPCR.** Fold change indicates the ratio of the treatment group  
 308 (3‰, 60‰, as indicated) to the control group (30‰). The mean fold changes and standard error of the mean of three  
 309 biological replicates are graphed. \* $P < 0.05$ , \*\* $P < 0.01$ , \*\*\* $P < 0.001$ .

## 310 4 Discussion

### 311 4.1 Synchronization in *L. marina* for Large-Scaled Analysis

312 According to the synchronization methods used for hermaphroditic worms such as *C. elegans* and *P.*  
 313 *pacificus* (Pires da Silva, 2005), we could not obtain enough L1 larvae samples for large-scale analysis  
 314 in terms of the dioecious marine nematode *L. marina*. Therefore, we instead allowed *L. marina* adults  
 315 to lay eggs on plates overnight, and then collected eggs from these plates. After a short-time treatment  
 316 with bleaching solution to kill *E. coli* OP50 in the washing solution, eggs were subsequently incubated  
 317 in filtered sterile seawater to hatch. Finally, synchronized newly hatched *L. marina* L1 larvae were  
 318 effectively obtained by filtration using a grid nylon filter with mesh size of 25  $\mu\text{m}$ . The establishment  
 319 of large-scale L1 larvae collecting protocol developed in this study will facilitate further *L. marina*  
 320 multi-omics studies, which requires large-scale synchronized worms.

### 321 4.2 Marine Nematode *L. marina* Has a Wider Range of Salinity Tolerance

322 In the intertidal areas, habitat salinity of *L. marina* is subject to either sudden or gradual changes in  
 323 response to tides, rainfall, ocean currents, seawater evaporation and climate. In the laboratory, we  
 324 found that *L. marina* could survive a wider salinity from 3‰ to 60‰. Of note, for marine nematodes,  
 325 60‰ salinity is obviously an extreme condition, which is almost twice of that of sea water. By contrast,  
 326 we noticed that *C. elegans* couldn't survive at 30‰ salinity (30 L1s per plate in triplicates). Thus, *L.*  
 327 *marina* is a euryhaline marine nematode and has a wider range of salinity tolerance than terrestrial  
 328 nematode *C. elegans*. Further studies using marine nematode *L. marina* as a model, will provide  
 329 universal mechanisms underlying marine invertebrates' euryhaline adaptation.

### 330 4.3 Transthyretin-Like (TTL) Family Genes are Presumably Involved in the Damage Control 331 Mechanisms in Response to Salinity Stresses

332 Under diverse environmental and physiological stresses, organisms usually demonstrate various  
 333 degrees of cell damage by stress-induced protein misfolding, denaturation or aggregation, thereby  
 334 disrupting proteostasis and cell homeostasis (Lamitina et al., 2006; Galluzzi et al., 2018). In the process  
 335 of stress response, common stress-inducible genes, such as heat shock protein genes, are induced to

## *L. marina* response to salinity stresses

336 protect cells (Spees et al., 2002;Lamitina et al., 2006). Such stress-inducible genes were also observed  
337 in our transcriptome results, for example, a series of HSP20, HSP70 family chaperone genes and  
338 dozens of proteasome related genes were significantly up-regulated under both low and high salinity  
339 stresses (**Supplementary file 3**).

340 In terms of shared common DEGs between both salinity stresses, one prominent type of significantly  
341 up-regulated were the transthyretin-like (TTL) family genes. In *L. marina*, at least 38 TTLs family  
342 genes have been annotated by database mining. In the present study, a total of 21 genes encoding TTLs  
343 were up-regulated under both hyposaline and hypersaline environments, suggesting that they might  
344 play important roles in responding to salinity stresses in *L. marina*. TTLs represent one of the largest  
345 nematode-specific protein families, sharing sequence similarity to vertebrate transthyretins (Parkinson  
346 et al., 2004). In vertebrates, transthyretins are present in extracellular fluids to transport thyroid  
347 hormones as well as vitamin A (Vieira and Saraiva, 2014). In terms of nematode TTLs, they were  
348 presumed to participate in disposal of toxic lipophilic moieties and hormonal signaling (Parkinson et  
349 al., 2004;Jacob et al., 2007). However, these elusive genes have not been implicated in the response to  
350 salinity stress up to now and their functions are largely unknown. TTR-52 was reported as a bridging  
351 factor involved in cell corps engulfment and apoptosis (Wang et al., 2010;Mapes et al., 2012),  
352 indicating that up-regulation of TTL genes might be part of the damage control mechanisms in response  
353 to either low or high salinity stresses in *L. marina*.

### 354 **4.4 Trehalose-6-phosphate synthase gene (TPS) is up-regulated in *L. marina* upon both Low** 355 **and High Salinity Stresses**

356 Cells of almost all organisms accumulate organic osmolytes when exposed to hyperosmolarity, and  
357 more than one type of osmolytes can be utilized for a particular organism (Burg and Ferraris, 2008).  
358 Unlike most marine invertebrates, which mainly use free amino acids and methylamines as organic  
359 osmolytes (Niu et al., 2020), it has well demonstrated that hyperosmotic stress in *C. elegans* activates  
360 rapid accumulation of glycerol via the rapid up-regulation of the glycerol-3-phosphate dehydrogenase  
361 enzyme *gpdh-1*, a key gene for de novo glycerol synthesis, thereby to balance the osmotic pressure  
362 (Lamitina et al., 2004;Lamitina et al., 2006). Based on the annotation information of *L. marina* genome,  
363 the predicted glycerol-3-phosphate dehydrogenase gene, EVM0001663/*gpdh-1*, was shown responsive  
364 to hypersaline stress in the current study, which was significantly up-regulated under high salinity  
365 (**Supplementary Figure 2**), indicating that *L. marina* might utilize glycerol as an osmolyte in response  
366 to high salinity stress similar to *C. elegans*.

367 Trehalose, a disaccharide of glucose, is present in a wide variety of organisms including nematodes,  
368 and is known to act as stress protectant to against effects of dehydration, desiccation, heat, freezing as  
369 well as high osmotic stress (Wharton, 2003;Erkut et al., 2011;Hibshman et al., 2020). It not only  
370 supports survival by stabilizing lipid membranes and improving proteostasis during water loss, but also  
371 serves as an energy source. It is known that trehalose-6-phosphate synthase gene (TPS) encodes the  
372 enzyme catalyzing the first step of trehalose biosynthesis (Watts and Ristow, 2017). Previously, it was  
373 reported that trehalose levels were elevated and conferred hypertonic stress resistance in *C. elegans*  
374 *age-1* mutants, which was suppressed by RNAi knockdown of TPS genes, indicating an important  
375 functional role of TPS in hypertonic stress resistance in *C. elegans* (Lamitina and Strange, 2005). In  
376 this study, we observed that *L. marina* TPS gene, EVM0007411/*tps-2*, was significantly up-regulated  
377 under both hyposaline and hypersaline stresses (**Figure 3B**), which could possibly cause accumulation  
378 of trehalose to facilitate its adaptation to both stress environments.

### 379 **4.5 Certain Neuronal Signaling are Transcriptionally Repressed by Salinity Stresses**

## *L. marina* response to salinity stresses

380 In *C. elegans*, acetylcholine, serotonin, dopamine, glutamate and neuropeptide are known important  
381 neurotransmitters, which have been well demonstrated their involvement in a broad repertoire of  
382 behaviors, including locomotion, feeding, reproduction, social behavior, mechanosensation,  
383 chemosensation, learning, memory, behavioral plasticity and adaptation (Chase and Koelle, 2007; Rand,  
384 2007; Hukema et al., 2008; Frooninckx et al., 2012; Vidal-Gadea and Pierce-Shimomura, 2012). Under  
385 harsh conditions, the nervous system plays critical roles in worm stress response, facilitating worm  
386 survival and adaptation (Kim and Jin, 2015). Although, specific neurons that function in osmotic stress  
387 response have studied extensively, for example, it is well known that ASH neurons are required for  
388 hyperosmotic sensation and ASEs are for hypoosmolarity, both types of neurons function in *C. elegans*  
389 osmotic avoidance behavior, allow worms to respond rapidly to escape from harmful osmotic stress  
390 conditions (Hilliard et al., 2005; Kunitomo et al., 2013). When osmotic stress is unavoidable, worms  
391 engage a sleep-like quiescent behavior and cease locomotion and feeding, which is dependent on ALA  
392 neuron (Hill et al., 2014). However, specific neurotransmitters, including serotonin, dopamine,  
393 glutamate and neuropeptide are only reported affecting avoidance behavior to NaCl in *C. elegans*  
394 (Hukema et al., 2008; Watteyne et al., 2020). To our knowledge, this is the first to describe a systematic  
395 repressed cholinergic, serotonergic, dopaminergic, glutamatergic and neuropeptide signaling in  
396 response to both low and high salinity stresses in *L. marina*.

397 In the present study, these reduced neural signaling are positively correlated with the reduced worm  
398 mobility in salinity stress environments. Furthermore, we speculate that these reduced signaling might  
399 further activate osmoregulation pathways in *L. marina* to promote its adaptation to the stressed salinity  
400 conditions.

### 401 **4.6 Unsaturated Fatty Acids (UFAs) are Involved in Hyposaline Stress Response in *L. marina***

402 Genes involved in UFAs biosynthesis were observed to be significantly up-regulated in low salinity  
403 condition. Defects in UFAs biosynthesis have been reported to cause deficiencies in worm growth,  
404 development and neurological function (Watts and Browse, 2002; Kniazeva et al., 2003). Notably, we  
405 found that several genes encoding fatty acid elongases (EVM0013022/*elo-2*, EVM0000630/*elo-5*) and  
406 fatty acid desaturases (EVM0008235/*fat-2*, EVM0011847/*fat-3*) were significantly decreased under  
407 hypersaline stress, which might account for the developmental defects in 60‰ salinity stressed worms.

408 UFAs have a profound effect on the fluidity, flexibility and permeability of cell membranes, as well as  
409 play important roles in energy storage and signaling process (Zhu and Han, 2014). The synthesis of  
410 UFAs is regulated during changing environmental conditions, playing a crucial role in environmental  
411 adaptation mechanism in organisms, such as animals, plants and microorganisms (Wada et al.,  
412 1990; Miquel et al., 1993; Svensk et al., 2013; Yancey, 2020; Zhang et al., 2020b). It has been widely  
413 reported that fatty acids were more unsaturated in salt-tolerant plants, yeast as well as bacterial cells  
414 (de Carvalho et al., 2014; Guo et al., 2019; Li et al., 2019). Moreover, Lucu *et al.* demonstrated that  
415 UFAs might be important during the acclimation of the shore crab *Carcinus aestuarii* to hypoosmotic  
416 condition (Lucu et al., 2008). However, nematode UFAs have not been implicated in the response to  
417 salinity stress as far as we know. Under hyposaline stress, body swelling is initially observed for *L.*  
418 *marina* L1s, due to the influx of fluid. While worms did present a better ability to tolerate and acclimate  
419 to this condition, showing relatively normal development and fertility afterwards. It suggests that the  
420 regulatory mechanism of body volume recovery is more effective under hyposaline stress. This may  
421 be related to the cell membrane properties and functions in *L. marina*. Thus, we propose that the  
422 effective induction of UFAs biosynthesis genes may acts as part of the protective and adaptative  
423 strategies of marine nematodes upon low salinity stress.

## *L. marina* response to salinity stresses

### 4.7 Cuticle Collagen Genes are Involved in Hypersaline Stress Response in *L. marina*

Collagens are major structural proteins for the nematode exoskeleton, cuticle. The identified *C. elegans* cuticle collagen mutants usually show either body morphology defects or locomotion defects, which is consistent with the cuticle's essential role for maintenance of body shape, as well as movement via attachments to muscles (Page and Johnstone, 2007). Moreover, several cuticle collagen mutants, such as *dpy-2*, *dpy-7* and *dpy-10*, were reported to exhibit constitutive activation of *gpdh-1* expression and glycerol accumulation, and show osmotic resistance phenotype (Lamitina et al., 2006; Wheeler and Thomas, 2006; Dodd et al., 2018). It is believed that the cuticle may serve as a sensor for osmotic stress and play important roles in *C. elegans* osmotic regulation (Lamitina et al., 2006; Dodd et al., 2018).

The cuticle in *C. elegans* is synthesized and secreted by underlying hypodermis, this process occurs five times during development, first at the end of embryogenesis before hatching and then again at the end of each larval stage before molting. *C. elegans* cuticle collagens are encoded by a multi-gene family, consisting over 170 genes (Page and Johnstone, 2007). In fact, these genes are not all expressed at the same time during cuticle synthesis. Clear spatial and temporal differences can be observed for individual genes (Johnstone, 2000; Page and Johnstone, 2007), indicating each cuticle collagen gene has specific roles in cuticle formation and function. The cuticle functions as the primary barrier between worm and its environment, and acts as the first line of defense against environmental stresses (Page and Johnstone, 2007). Previously, Dodd *et al.* has shown that multiple cuticle collagen genes can be induced when *C. elegans* exposed to high NaCl (Dodd et al., 2018). Recently, we reported that a battery of collagen genes in *C. elegans* increased their expression to deal with acidic pH stress environments (Cong et al., 2020). Together, these results indicated a protective role of collagens in response to various stresses. Similarly, in the present study, an abundant group of over 20 cuticle collagen genes were significantly up-regulated upon hypersaline stress, while most of them were remarkably down-regulated upon hyposaline stress, indicating certain collagens could specifically function to detect or transform salinity stress-induced signals, or just change the chemical and physical composition of the cuticle to provide the primary barrier to defend the dynamic osmotic variation.

### 4.8 Cytoskeleton related genes are Differentially Regulated under Different Salinity Stresses in *L. marina*

Tubulin is the basic component of cytoskeleton microtubules. It plays an indispensable role in structure maintaining, neuronal sensation as well as many other cell processes including intraflagellar transport (IFT). In our results, four tubulin genes, such as EVM0017317/*tba-4*, EVM0007116/*tba-5*, EVM0015250 and EVM0004244/*ben-1*, exhibited specific up-regulation when salinity is decreasing (**Figure 4C**). The *tba-4* gene encodes  $\alpha$ -tubulin in *C. elegans*, both TBA-5 and BEN-1 are neuronal tubulins (Hurd, 2018). TBA-5 is an axonemal  $\alpha$ -tubulin expressed in amphid and phasmid sensory neurons where it is localized to cilia. BEN-1 is a neuronal  $\beta$ -tubulin in *C. elegans*, which is also broadly expressed in the nervous system. Moreover, it is reported that IFT is essential for assembly, maintenance and function of sensory cilia in *C. elegans* (Hao et al., 2011). Here, we found that two IFT genes (EVM0001368/*osm-3* and EVM0002085//*daf-10*) were induced expression specifically under low salinity condition (**Figure 4C**). The *osm-3* gene in *C. elegans* encodes a kinesin-2 family member of IFT motors, mediating IFT particles transport within sensory cilia (Prevo et al., 2015). *daf-10* is required for IFT and for proper development of a number of sensory neurons (Bell et al., 2006). By contrast, both *tba-5* and *daf-10* genes were found to be upregulated in the osmo-resistant *dpy-7* worms (Dodd et al., 2018). Moreover, the above tubulin and IFT genes exhibited significantly opposing changes between low and high salinity stresses (**Figure 4B-C**), indicating their critical roles in salinity stress response.

## *L. marina* response to salinity stresses

469 In conclusion, we have described for the first time the genome-wide transcriptional responses to both  
470 hyposaline and hypersaline stresses in the marine nematode *L. marina*. The present study will provide  
471 an essential foundation for identifying the key genes and genetic pathways required for osmoregulation  
472 in the marine nematodes. Given a wide range of salinity tolerance of the marine nematodes, our results  
473 and further genetic analysis of key gene(s) of osmoregulation in *L. marina* will likely provide important  
474 insights into biological evolution and physiological adaptation mechanisms in nematodes and other  
475 organisms in general.

### 476 **5 Article types**

477 Original Research Article.

### 478 **6 Conflict of Interest**

479 *The authors declare that the research was conducted in the absence of any commercial or financial*  
480 *relationships that could be construed as a potential conflict of interest.*

### 481 **7 Author Contributions**

482 YX and LZ conceived and designed the experiments. YX carried out most of the experiments, analyzed  
483 the data, and wrote the manuscript. PZ contributed to the RNA-seq sampling and qPCR validation. LZ  
484 edited the manuscript and supervised the project. All authors read and approved the final manuscript.

### 485 **8 Funding**

486 This work was funded by the National Key R and D Program of China [No. 2018YFD0901301]; the  
487 National Natural Science Foundation of China [No. 41806169]; Qingdao National Laboratory for  
488 Marine Science and Technology [No. YQ2018NO10]; “Talents from overseas Program, IOCAS” of  
489 the Chinese Academy of Sciences; “Qingdao Innovation Leadership Program” [Grant 16-8-3-19-zhc];  
490 and Key deployment project of Centre for Ocean Mega-Research of Science, Chinese Academy of  
491 Sciences.

### 492 **9 Acknowledgments**

493 We are grateful to all members of the LZ laboratory for their helpful discussions.

### 494 **10 Data Availability Statement**

495 The datasets generated for this study can be found in NCBI, and the BioProject ID: PRJNA694479.

### 496 **11 Supplementary Figures**

## *L. marina* response to salinity stresses

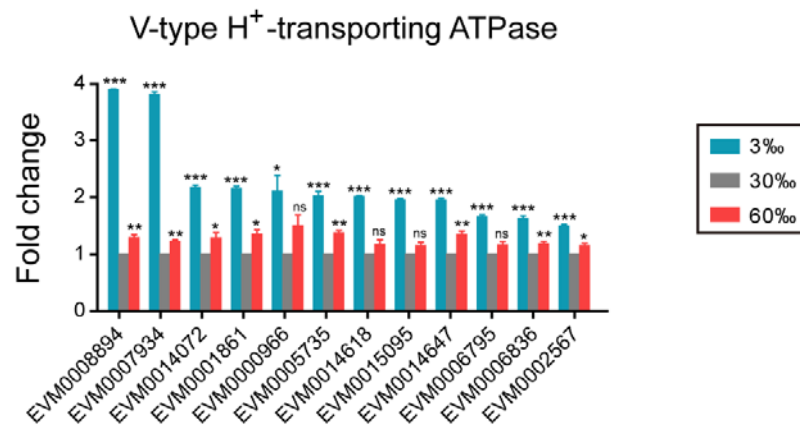

497

498 **Supplementary FIGURE 1. Expression level of V-type H<sup>+</sup>-transporting ATPase genes upon salinity stresses in *L.***  
 499 ***marina*.** Fold change indicates the ratio of the treatment group (3‰, 60‰, as indicated) to the control group (30‰). The  
 500 error bars represent standard error of the mean of three biological replicates per condition. \**P* < 0.05, \*\**P* < 0.01, \*\*\**P* <  
 501 0.001.

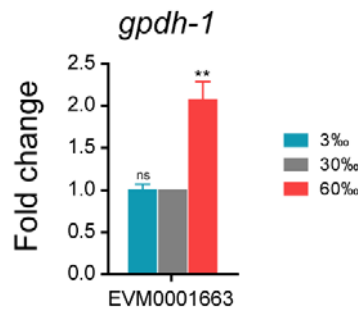

502

503 **Supplementary FIGURE 2. Expression level of *L. marina* glycerol-3-phosphate dehydrogenase gene upon salinity**  
 504 **stresses.** Fold change indicates the ratio of the treatment group (3‰, 60‰, as indicated) to the control group (30‰). The  
 505 error bars represent standard error of the mean of three biological replicates per condition. \**P* < 0.05, \*\**P* < 0.01, \*\*\**P* <  
 506 0.001.

## 507 **References**

- 508 Appeltans, W., Ahyong, S.T., Anderson, G., Angel, M.V., Artois, T., Bailly, N., Bamber, R., Barber,  
 509 A., Bartsch, I., Berta, A., et al. (2012). The magnitude of global marine species diversity.  
 510 *Curr Biol* 22, 2189-2202.
- 511 Bargmann, C.I. (2006). Chemosensation in *C. elegans*. *WormBook*, 1-29.
- 512 Bell, L.R., Stone, S., Yochem, J., Shaw, J.E., and Herman, R.K. (2006). The molecular identities of  
 513 the *Caenorhabditis elegans* intraflagellar transport genes *dyf-6*, *daf-10* and *osm-1*. *Genetics*  
 514 173, 1275-1286.
- 515 Brewster, J.L., and Gustin, M.C. (2014). Hog1: 20 years of discovery and impact. *Sci Signal* 7, re7.
- 516 Burg, M.B., and Ferraris, J.D. (2008). Intracellular organic osmolytes: function and regulation. *J Biol*  
 517 *Chem* 283, 7309-7313.
- 518 Burg, M.B., Ferraris, J.D., and Dmitrieva, N.I. (2007). Cellular response to hyperosmotic stresses.  
 519 *Physiol Rev* 87, 1441-1474.



## *L. marina* response to salinity stresses

- 520 Burton, N.O., Furuta, T., Webster, A.K., Kaplan, R.E., Baugh, L.R., Arur, S., and Horvitz, H.R.  
521 (2017). Insulin-like signalling to the maternal germline controls progeny response to osmotic  
522 stress. *Nat Cell Biol* 19, 252-257.
- 523 Chase, D.L., and Koelle, M.R. (2007). Biogenic amine neurotransmitters in *C. elegans*. *WormBook*,  
524 1-15.
- 525 Choe, K.P. (2013). Physiological and molecular mechanisms of salt and water homeostasis in the  
526 nematode *Caenorhabditis elegans*. *Am J Physiol Regul Integr Comp Physiol* 305, R175-186.
- 527 Cong, Y., Yang, H., Zhang, P., Xie, Y., Cao, X., and Zhang, L. (2020). Transcriptome Analysis of  
528 the Nematode *Caenorhabditis elegans* in Acidic Stress Environments. *Front Physiol* 11, 1107.
- 529 De Carvalho, C.C., Marques, M.P., Hachicho, N., and Heipieper, H.J. (2014). Rapid adaptation of  
530 *Rhodococcus erythropolis* cells to salt stress by synthesizing polyunsaturated fatty acids. *Appl*  
531 *Microbiol Biotechnol* 98, 5599-5606.
- 532 Derycke, S., De Meester, N., Rigaux, A., Creer, S., Bik, H., Thomas, W.K., and Moens, T. (2016).  
533 Coexisting cryptic species of the *Litoditis marina* complex (Nematoda) show differential  
534 resource use and have distinct microbiomes with high intraspecific variability. *Mol Ecol* 25,  
535 2093-2110.
- 536 Dodd, W., Tang, L., Lone, J.C., Wimberly, K., Wu, C.W., Consalvo, C., Wright, J.E., Pujol, N., and  
537 Choe, K.P. (2018). A Damage Sensor Associated with the Cuticle Coordinates Three Core  
538 Environmental Stress Responses in *Caenorhabditis elegans*. *Genetics* 208, 1467-1482.
- 539 Dresen, A., Finkbeiner, S., Dottermusch, M., Beume, J.S., Li, Y., Walz, G., and Neumann-Haefelin,  
540 E. (2015). *Caenorhabditis elegans* OSM-11 signaling regulates SKN-1/Nrf during embryonic  
541 development and adult longevity and stress response. *Dev Biol* 400, 118-131.
- 542 Erkut, C., Penkov, S., Khesbak, H., Vorkel, D., Verbavatz, J.M., Fahmy, K., and Kurzchalia, T.V.  
543 (2011). Trehalose renders the dauer larva of *Caenorhabditis elegans* resistant to extreme  
544 desiccation. *Curr Biol* 21, 1331-1336.
- 545 Frooninckx, L., Van Rompay, L., Temmerman, L., Van Sinay, E., Beets, I., Janssen, T., Husson, S.J.,  
546 and Schoofs, L. (2012). Neuropeptide GPCRs in *C. elegans*. *Front Endocrinol (Lausanne)* 3,  
547 167.
- 548 Galluzzi, L., Yamazaki, T., and Kroemer, G. (2018). Linking cellular stress responses to systemic  
549 homeostasis. *Nat Rev Mol Cell Biol* 19, 731-745.
- 550 Guo, Q., Liu, L., and Barkla, B.J. (2019). Membrane Lipid Remodeling in Response to Salinity. *Int J*  
551 *Mol Sci* 20.
- 552 Hao, L., Thein, M., Brust-Mascher, I., Civelekoglu-Scholey, G., Lu, Y., Acar, S., Prevo, B., Shaham,  
553 S., and Scholey, J.M. (2011). Intraflagellar transport delivers tubulin isoforms to sensory  
554 cilium middle and distal segments. *Nat Cell Biol* 13, 790-798.
- 555 He, F.J., and Macgregor, G.A. (2018). Role of salt intake in prevention of cardiovascular disease:  
556 controversies and challenges. *Nat Rev Cardiol* 15, 371-377.
- 557 Hibshman, J.D., Clegg, J.S., and Goldstein, B. (2020). Mechanisms of Desiccation Tolerance:  
558 Themes and Variations in Brine Shrimp, Roundworms, and Tardigrades. *Front Physiol* 11,  
559 592016.
- 560 Hill, A.J., Mansfield, R., Lopez, J.M., Raizen, D.M., and Van Buskirk, C. (2014). Cellular stress  
561 induces a protective sleep-like state in *C. elegans*. *Curr Biol* 24, 2399-2405.

## *L. marina* response to salinity stresses

- 562 Hilliard, M.A., Apicella, A.J., Kerr, R., Suzuki, H., Bazzicalupo, P., and Schafer, W.R. (2005). In  
563 vivo imaging of *C. elegans* ASH neurons: cellular response and adaptation to chemical  
564 repellents. *Embo j* 24, 63-72.
- 565 Hoogewijs, D., Houthoofd, K., Matthijssens, F., Vandesompele, J., and Vanfleteren, J.R. (2008).  
566 Selection and validation of a set of reliable reference genes for quantitative sod gene  
567 expression analysis in *C. elegans*. *BMC Mol Biol* 9, 9.
- 568 Hukema, R.K., Rademakers, S., and Jansen, G. (2008). Gustatory plasticity in *C. elegans* involves  
569 integration of negative cues and NaCl taste mediated by serotonin, dopamine, and glutamate.  
570 *Learn Mem* 15, 829-836.
- 571 Hurd, D.D. (2018). Tubulins in *C. elegans*. *WormBook* 2018, 1-32.
- 572 Igual Gil, C., Jarius, M., Von Kries, J.P., and Rohlfing, A.K. (2017). Neuronal Chemosensation and  
573 Osmotic Stress Response Converge in the Regulation of *aqp-8* in *C. elegans*. *Front Physiol* 8,  
574 380.
- 575 Jacob, J., Vanholme, B., Haegeman, A., and Gheysen, G. (2007). Four transthyretin-like genes of the  
576 migratory plant-parasitic nematode *Radopholus similis*: members of an extensive nematode-  
577 specific family. *Gene* 402, 9-19.
- 578 Johnstone, I.L. (2000). Cuticle collagen genes. Expression in *Caenorhabditis elegans*. *Trends Genet*  
579 16, 21-27.
- 580 Kanehisa, M., and Goto, S. (2000). KEGG: kyoto encyclopedia of genes and genomes. *Nucleic Acids*  
581 *Res* 28, 27-30.
- 582 Kim, D., Langmead, B., and Salzberg, S.L. (2015). HISAT: a fast spliced aligner with low memory  
583 requirements. *Nat Methods* 12, 357-360.
- 584 Kim, K.W., and Jin, Y. (2015). Neuronal responses to stress and injury in *C. elegans*. *FEBS Lett* 589,  
585 1644-1652.
- 586 Kniazeva, M., Sieber, M., Mccauley, S., Zhang, K., Watts, J.L., and Han, M. (2003). Suppression of  
587 the ELO-2 FA elongation activity results in alterations of the fatty acid composition and  
588 multiple physiological defects, including abnormal ultradian rhythms, in *Caenorhabditis*  
589 *elegans*. *Genetics* 163, 159-169.
- 590 Kunitomo, H., Sato, H., Iwata, R., Satoh, Y., Ohno, H., Yamada, K., and Iino, Y. (2013).  
591 Concentration memory-dependent synaptic plasticity of a taste circuit regulates salt  
592 concentration chemotaxis in *Caenorhabditis elegans*. *Nat Commun* 4, 2210.
- 593 Lamitina, S.T., Morrison, R., Moeckel, G.W., and Strange, K. (2004). Adaptation of the nematode  
594 *Caenorhabditis elegans* to extreme osmotic stress. *Am J Physiol Cell Physiol* 286, C785-791.
- 595 Lamitina, S.T., and Strange, K. (2005). Transcriptional targets of DAF-16 insulin signaling pathway  
596 protect *C. elegans* from extreme hypertonic stress. *Am J Physiol Cell Physiol* 288, C467-474.
- 597 Lamitina, T., Huang, C.G., and Strange, K. (2006). Genome-wide RNAi screening identifies protein  
598 damage as a regulator of osmoprotective gene expression. *Proc Natl Acad Sci U S A* 103,  
599 12173-12178.
- 600 Li, H., Ma, L., Hu, Z., Tu, Y., Jiang, C., Wu, Q., Han, J., Zeng, B., and He, B. (2019). Heterologous  
601 expression of *AoD9D* enhances salt tolerance with increased accumulation of unsaturated  
602 fatty acid in transgenic *Saccharomyces cerevisiae*. *J Ind Microbiol Biotechnol* 46, 231-239.

## *L. marina* response to salinity stresses

- 603 Liao, Y., Smyth, G.K., and Shi, W. (2014). featureCounts: an efficient general purpose program for  
604 assigning sequence reads to genomic features. *Bioinformatics* 30, 923-930.
- 605 Livak, K.J., and Schmittgen, T.D. (2001). Analysis of relative gene expression data using real-time  
606 quantitative PCR and the 2<sup>-</sup>( $\Delta\Delta C_T$ ) Method. *Methods* 25, 402-408.
- 607 Love, M.I., Huber, W., and Anders, S. (2014). Moderated estimation of fold change and dispersion  
608 for RNA-seq data with DESeq2. *Genome Biol* 15, 550.
- 609 Lucu, C., Pavčić, J., Ivanković, D., Pavčić-Hamer, D., and Najdek, M. (2008). Changes in Na<sup>+</sup>/K<sup>+</sup>-  
610 ATPase activity, unsaturated fatty acids and metallothioneins in gills of the shore crab  
611 *Carcinus aestuarii* after dilute seawater acclimation. *Comp Biochem Physiol A Mol Integr  
612 Physiol* 149, 362-372.
- 613 Mapes, J., Chen, Y.Z., Kim, A., Mitani, S., Kang, B.H., and Xue, D. (2012). CED-1, CED-7, and  
614 TTR-52 regulate surface phosphatidylserine expression on apoptotic and phagocytic cells.  
615 *Curr Biol* 22, 1267-1275.
- 616 Miquel, M., James, D., Jr., Dooner, H., and Browse, J. (1993). Arabidopsis requires polyunsaturated  
617 lipids for low-temperature survival. *Proc Natl Acad Sci U S A* 90, 6208-6212.
- 618 Niu, J., Hu, X.L., Ip, J.C.H., Ma, K.Y., Tang, Y., Wang, Y., Qin, J., Qiu, J.W., Chan, T.F., and Chu,  
619 K.H. (2020). Multi-omic approach provides insights into osmoregulation and  
620 osmoconformation of the crab *Scylla paramamosain*. *Sci Rep* 10, 21771.
- 621 Page, A.P., and Johnstone, I.L. (2007). The cuticle. *WormBook*, 1-15.
- 622 Parkinson, J., Mitreva, M., Whitton, C., Thomson, M., Daub, J., Martin, J., Schmid, R., Hall, N.,  
623 Barrell, B., Waterston, R.H., McCarter, J.P., and Blaxter, M.L. (2004). A transcriptomic  
624 analysis of the phylum Nematoda. *Nat Genet* 36, 1259-1267.
- 625 Pasantes-Morales, H. (2016). Channels and Volume Changes in the Life and Death of the Cell. *Mol  
626 Pharmacol* 90, 358-370.
- 627 Pertea, M., Pertea, G.M., Antonescu, C.M., Chang, T.C., Mendell, J.T., and Salzberg, S.L. (2015).  
628 StringTie enables improved reconstruction of a transcriptome from RNA-seq reads. *Nat  
629 Biotechnol* 33, 290-295.
- 630 Pires Da Silva, A. (2005). *Pristionchus pacificus* genetic protocols. *WormBook*, 1-8.
- 631 Prevo, B., Mangeol, P., Oswald, F., Scholey, J.M., and Peterman, E.J. (2015). Functional  
632 differentiation of cooperating kinesin-2 motors orchestrates cargo import and transport in *C.  
633 elegans* cilia. *Nat Cell Biol* 17, 1536-1545.
- 634 Rand, J.B. (2007). Acetylcholine. *WormBook*, 1-21.
- 635 Rota-Stabelli, O., Daley, A.C., and Pisani, D. (2013). Molecular timetrees reveal a Cambrian  
636 colonization of land and a new scenario for ecdysozoan evolution. *Curr Biol* 23, 392-398.
- 637 Rust, P., and Ekmekcioglu, C. (2017). Impact of Salt Intake on the Pathogenesis and Treatment of  
638 Hypertension. *Adv Exp Med Biol* 956, 61-84.
- 639 Spees, J.L., Chang, S.A., Snyder, M.J., and Chang, E.S. (2002). Osmotic induction of stress-  
640 responsive gene expression in the lobster *Homarus americanus*. *Biol Bull* 203, 331-337.
- 641 Strange, K., Denton, J., and Nehrke, K. (2006). Ste20-type kinases: evolutionarily conserved  
642 regulators of ion transport and cell volume. *Physiology (Bethesda)* 21, 61-68.

## *L. marina* response to salinity stresses

- 643 Svensk, E., Ståhlman, M., Andersson, C.H., Johansson, M., Borén, J., and Pilon, M. (2013). PAQR-2  
644 regulates fatty acid desaturation during cold adaptation in *C. elegans*. *PLoS Genet* 9,  
645 e1003801.
- 646 Van Den Elsen, S., Holovachov, O., Karssen, G., Van Megen, H., Helder, J., Bongers, T., Bakker, J.,  
647 Holterman, M., and Mooyman, P. (2009). A phylogenetic tree of nematodes based on about  
648 1200 full-length small subunit ribosomal DNA sequences. *Nematology* 11, 927-950.
- 649 Vidal-Gadea, A.G., and Pierce-Shimomura, J.T. (2012). Conserved role of dopamine in the  
650 modulation of behavior. *Commun Integr Biol* 5, 440-447.
- 651 Vieira, M., and Saraiva, M.J. (2014). Transthyretin: a multifaceted protein. *Biomol Concepts* 5, 45-  
652 54.
- 653 Vij, S., Purushothaman, K., Sridatta, P.S.R., and Jerry, D.R. (2020). Transcriptomic Analysis of Gill  
654 and Kidney from Asian Seabass (*Lates calcarifer*) Acclimated to Different Salinities Reveals  
655 Pathways Involved with Euryhalinity. *Genes (Basel)* 11.
- 656 Wada, H., Gombos, Z., and Murata, N. (1990). Enhancement of chilling tolerance of a  
657 cyanobacterium by genetic manipulation of fatty acid desaturation. *Nature* 347, 200-203.
- 658 Wang, L., Wang, W.N., Liu, Y., Cai, D.X., Li, J.Z., and Wang, A.L. (2012). Two types of ATPases  
659 from the Pacific white shrimp, *Litopenaeus vannamei* in response to environmental stress.  
660 *Mol Biol Rep* 39, 6427-6438.
- 661 Wang, X., Li, W., Zhao, D., Liu, B., Shi, Y., Chen, B., Yang, H., Guo, P., Geng, X., Shang, Z.,  
662 Peden, E., Kage-Nakadai, E., Mitani, S., and Xue, D. (2010). Caenorhabditis elegans  
663 transthyretin-like protein TTR-52 mediates recognition of apoptotic cells by the CED-1  
664 phagocyte receptor. *Nat Cell Biol* 12, 655-664.
- 665 Watteyne, J., Peymen, K., Van Der Auwera, P., Borghgraef, C., Vandeweyer, E., Van Damme, S.,  
666 Rutten, I., Lammertyn, J., Jelier, R., Schoofs, L., and Beets, I. (2020). Neuromedin U  
667 signaling regulates retrieval of learned salt avoidance in a *C. elegans* gustatory circuit. *Nat*  
668 *Commun* 11, 2076.
- 669 Watts, J.L., and Browse, J. (2002). Genetic dissection of polyunsaturated fatty acid synthesis in  
670 *Caenorhabditis elegans*. *Proc Natl Acad Sci U S A* 99, 5854-5859.
- 671 Watts, J.L., and Ristow, M. (2017). Lipid and Carbohydrate Metabolism in *Caenorhabditis elegans*.  
672 *Genetics* 207, 413-446.
- 673 Wharton, D.A. (2003). The environmental physiology of Antarctic terrestrial nematodes: a review. *J*  
674 *Comp Physiol B* 173, 621-628.
- 675 Wheeler, J.M., and Thomas, J.H. (2006). Identification of a novel gene family involved in osmotic  
676 stress response in *Caenorhabditis elegans*. *Genetics* 174, 1327-1336.
- 677 Xie, Y., Zhang, P., Xue, B., Cao, X., Ren, X., Wang, L., Sun, Y., Yang, H., and Zhang, L. (2020).  
678 Establishment of a marine nematode model for animal functional genomics, environmental  
679 adaptation and developmental evolution. *bioRxiv*, 2020.2003.2006.980219.
- 680 Yancey, P.H. (2020). Cellular responses in marine animals to hydrostatic pressure. *J Exp Zool A Ecol*  
681 *Integr Physiol* 333, 398-420.
- 682 Yang, Y., and Guo, Y. (2018). Elucidating the molecular mechanisms mediating plant salt-stress  
683 responses. *New Phytol* 217, 523-539.

## *L. marina* response to salinity stresses

- 684 Young, M.D., Wakefield, M.J., Smyth, G.K., and Oshlack, A. (2010). Gene ontology analysis for  
685 RNA-seq: accounting for selection bias. *Genome Biol* 11, R14.
- 686 Zhang, L., Gualberto, D.G., Guo, X., Correa, P., Jee, C., and Garcia, L.R. (2015). TMC-1 attenuates  
687 *C. elegans* development and sexual behaviour in a chemically defined food environment. *Nat*  
688 *Commun* 6, 6345.
- 689 Zhang, Y., Wu, Q., Fang, S., Li, S., Zheng, H., Zhang, Y., Ikhwanuddin, M., and Ma, H. (2020a).  
690 mRNA profile provides novel insights into stress adaptation in mud crab megalopa, *Scylla*  
691 *paramamosain* after salinity stress. *BMC Genomics* 21, 559.
- 692 Zhang, Z., Qu, C., Zhang, K., He, Y., Zhao, X., Yang, L., Zheng, Z., Ma, X., Wang, X., Wang, W.,  
693 Wang, K., Li, D., Zhang, L., Zhang, X., Su, D., Chang, X., Zhou, M., Gao, D., Jiang, W.,  
694 Leliaert, F., Bhattacharya, D., De Clerck, O., Zhong, B., and Miao, J. (2020b). Adaptation to  
695 Extreme Antarctic Environments Revealed by the Genome of a Sea Ice Green Alga. *Curr Biol*  
696 30, 3330-3341.e3337.
- 697 Zhou, X., Naguro, I., Ichijo, H., and Watanabe, K. (2016). Mitogen-activated protein kinases as key  
698 players in osmotic stress signaling. *Biochim Biophys Acta* 1860, 2037-2052.
- 699 Zhu, H., and Han, M. (2014). Exploring developmental and physiological functions of fatty acid and  
700 lipid variants through worm and fly genetics. *Annu Rev Genet* 48, 119-148.
